# Supplementary material for: Thermal Kinetics of Monocationic and Dicationic Pyrrolidinium-Based Ionic Liquids
Source: MDPI journal article supplement (doi:10.3390/ma15031247), 2022-02-08
Supplement: s1 [file s1]

# Thermal Kinetics of Monocationic and Dicationic Pyrrolidinium-Based Ionic Liquids

Asyraf Hanim Ab Rahim <sup>1</sup>, Noraini Abd Ghani <sup>1,2,\*</sup>, Noorhafizah Hasanudin <sup>1</sup>, Normawati M. Yunus <sup>1,2</sup> and Ninna Sakina Azman <sup>1,2</sup>

<sup>1</sup> Centre of Research in Ionic Liquids, Universiti Teknologi PETRONAS, Seri Iskandar 32610, Perak, Malaysia; asyrafhanim92@gmail.com (A.H.A.R.); fiezah\_hfzh@yahoo.com (N.H.); normaw@utp.edu.my (N.M.Y.); ninna.azman@gmail.com (N.S.A.)

<sup>2</sup> Fundamental and Applied Sciences Department, Universiti Teknologi PETRONAS, Seri Iskandar 32610, Perak, Malaysia

\* Correspondence: noraini.ghani@utp.edu.my

**Table S1.** Average temperature of [C<sub>4</sub>MPyr][Br] at each  $\alpha$  value of thermal kinetic decomposition.

| $\alpha$ | Rate (°C/min) |         |          |         |       |
|----------|---------------|---------|----------|---------|-------|
|          | 5             | 10      | 15       | 20      | 25    |
| 0.1      | 241±1         | 250±0.7 | 255±2    | 259±1   | 261±3 |
| 0.2      | 258±2         | 268±0.7 | 272±0.5  | 275±0.5 | 277±2 |
| 0.3      | 269±3         | 278±0.3 | 282±0.4  | 284±1   | 286±2 |
| 0.4      | 278±4         | 287±0.5 | 292±0.05 | 292±1   | 295±2 |
| 0.5      | 286±5         | 296±2   | 301±0.3  | 302±0.5 | 303±2 |
| 0.6      | 295±5         | 305±4   | 312±0.8  | 312±3   | 313±1 |
| 0.7      | 3030±4        | 314±6   | 323±0.8  | 324±5   | 326±1 |
| 0.8      | 311±2.10      | 324±10  | 335±1    | 338±9   | 339±4 |
| 0.9      | 321±0.4       | 334±14  | 347±3    | 353±9   | 355±7 |

**Table S2.** Average temperature of [BisC<sub>4</sub>MPyr][Br] at each  $\alpha$  value thermal kinetic decomposition.

| $\alpha$ | Rate (°C/min) |          |       |          |          |
|----------|---------------|----------|-------|----------|----------|
|          | 5             | 10       | 15    | 20       | 25       |
| 0.1      | 199±0.5       | 209±0.07 | 213±7 | 216±8    | 222 ±0.2 |
| 0.2      | 212±0.04      | 222±0.6  | 228±5 | 232±6    | 237±0.6  |
| 0.3      | 229±2         | 237±2    | 243±5 | 249±7    | 251±0.5  |
| 0.4      | 244±3         | 254±2    | 260±2 | 269±2    | 268±2    |
| 0.5      | 258±3         | 269±2    | 274±2 | 287±3    | 285±3    |
| 0.6      | 270±3         | 283±3    | 289±2 | 302±4    | 301±4    |
| 0.7      | 285±3         | 298±4    | 306±4 | 318±4    | 318±3    |
| 0.8      | 303±2         | 315±6    | 323±4 | 334±2    | 336±4    |
| 0.9      | 323±4         | 331±5    | 340±5 | 350±0.23 | 353±5    |
